# Supplementary material
Source: PubMed Central journal article supplement (PMC5203622)
Supplement: AEM.02265-16_zam999117600s1.pdf [file AEM.02265-16_zam999117600s1.pdf]

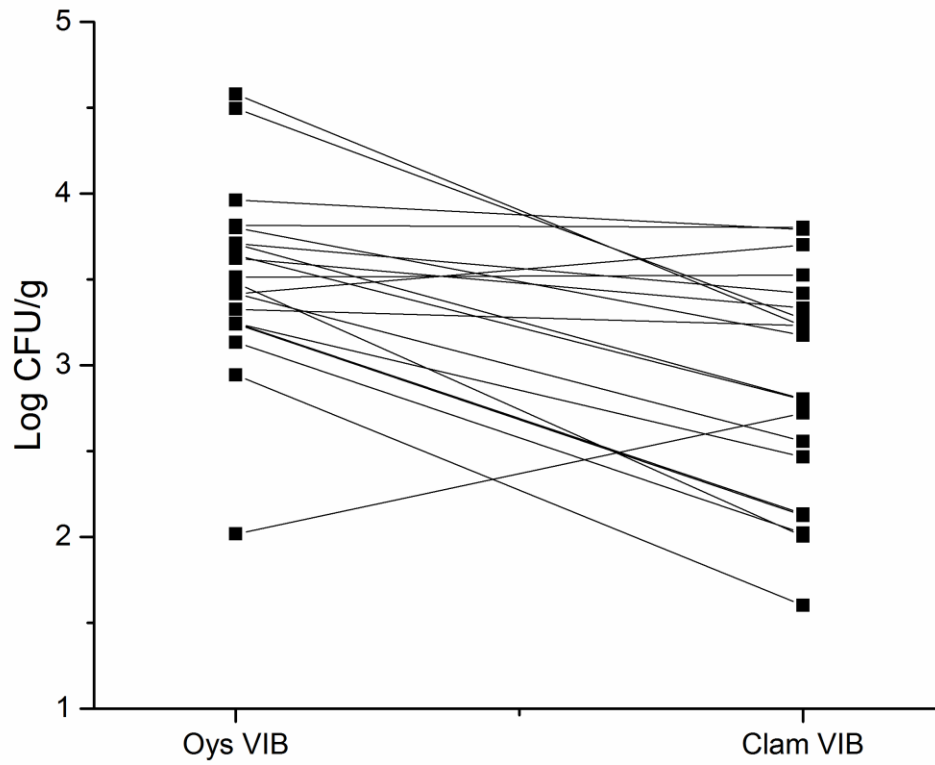

Figure S1: Paired concentrations of total *Vibrio* spp. in oysters and clams from samples harvested simultaneously at the same site.

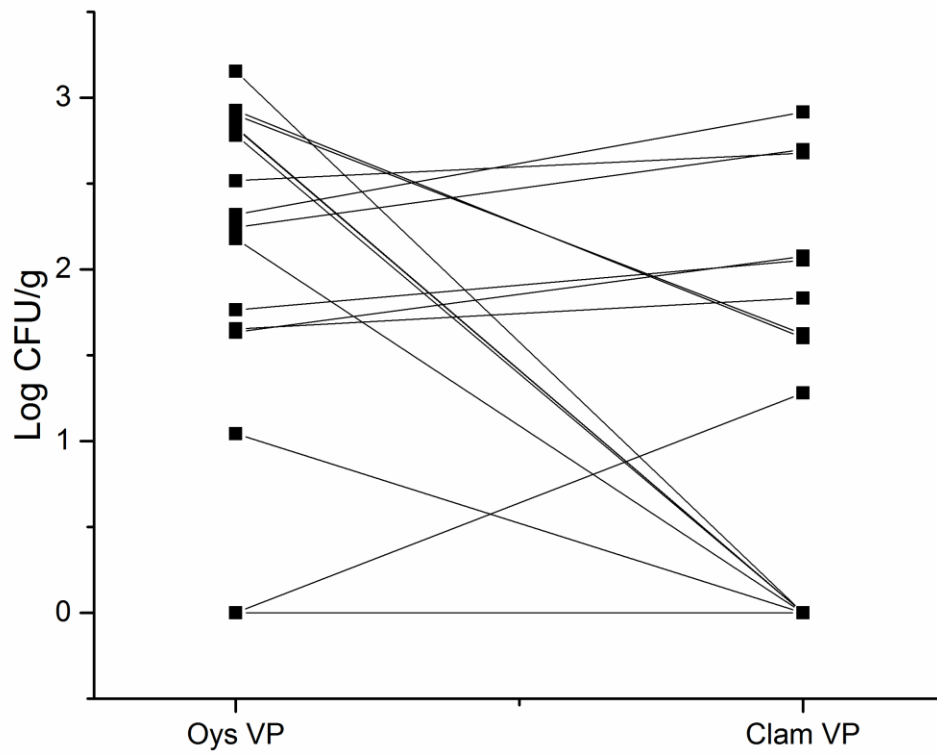

Figure S2: Paired concentrations of *V. parahaemolyticus* in oysters and clams from samples harvested simultaneously at the same site.

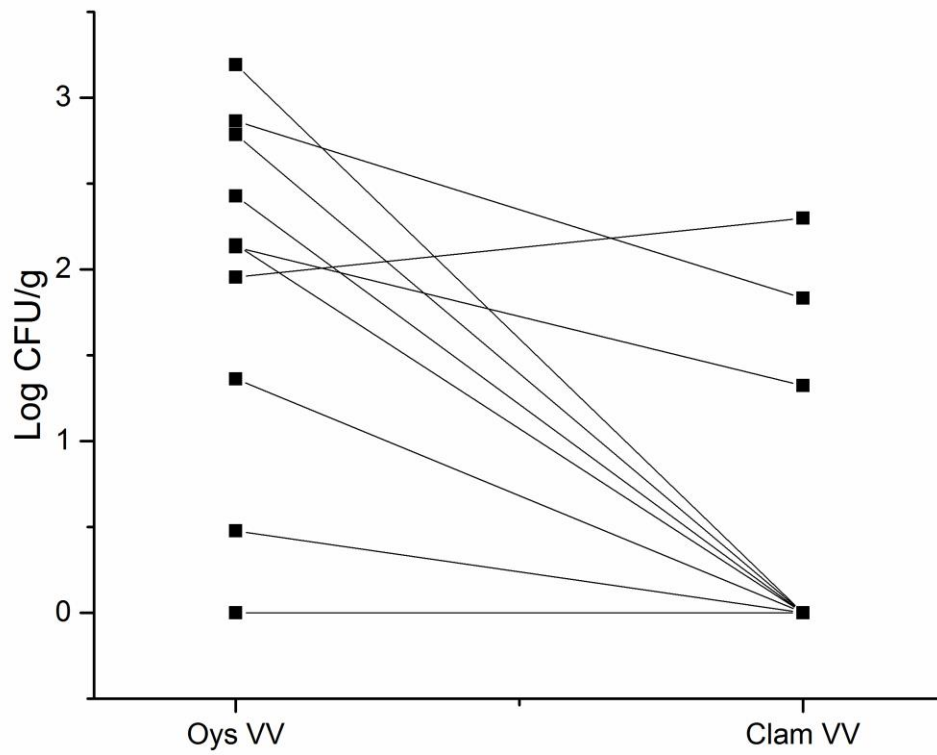

Figure S3: Paired concentrations of *V. vulnificus* in oysters and clams from samples harvested simultaneously at the same site.

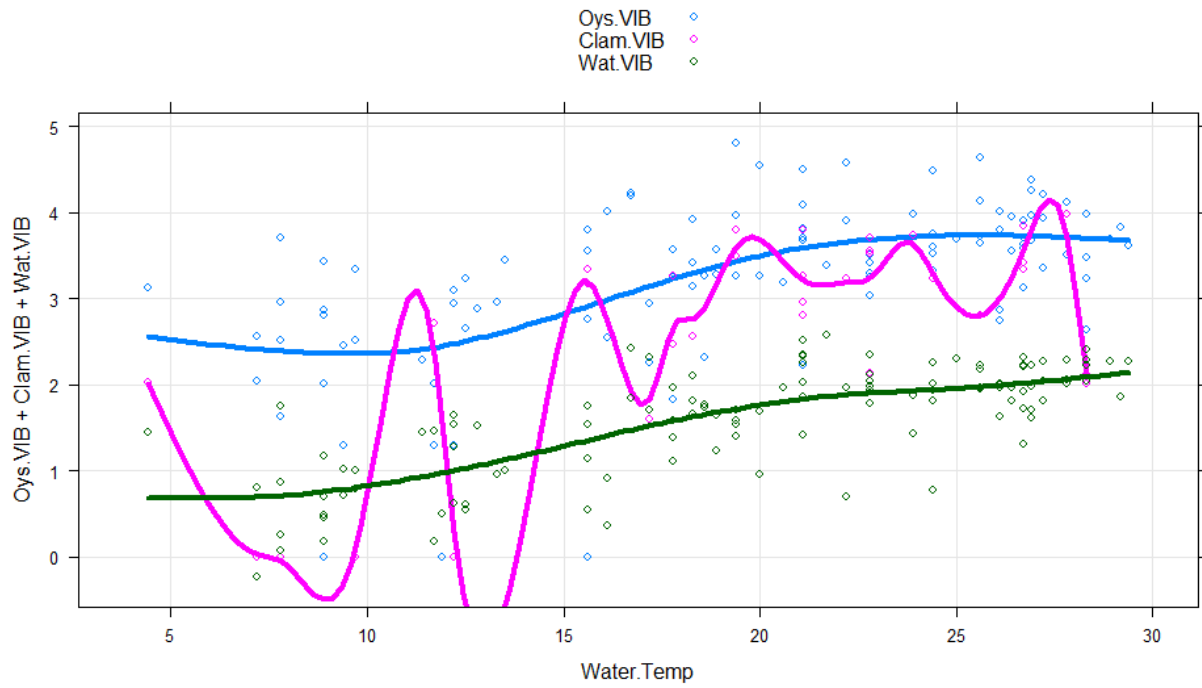

Figure S4: Log total *Vibrio* in oysters (blue), clams (magenta), and water (green) compared to water temperature in Celcius at time of sample collection. Data is displayed in CFU/g for shellfish samples and CFU/ml for water. Circles are individual data while lines are smoothed averages

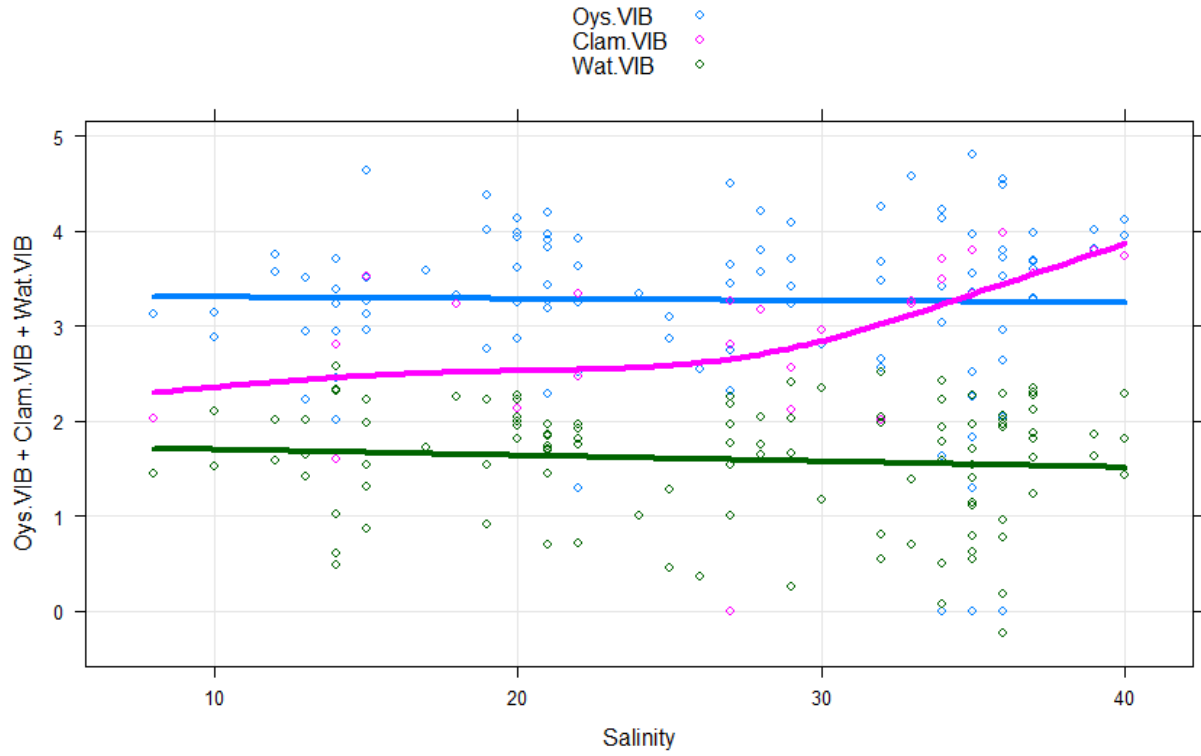

Figure S5: Log total *Vibrio* in oysters (blue), clams (magenta), and water (green) compared to salinity at time of sample collection. Data is displayed in CFU/g for shellfish samples and CFU/ml for water. Circles are individual data while lines are smoothed averages. Salinity is in parts per thousand.

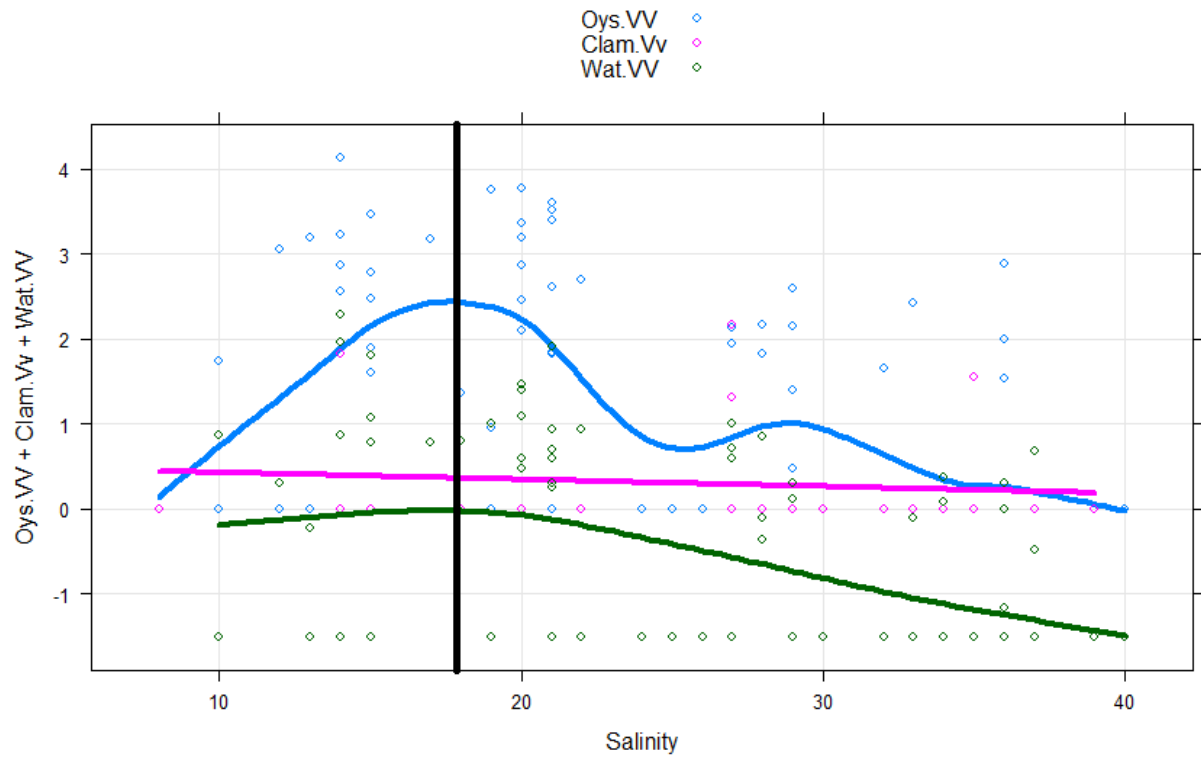

Figure S6: Log *V. vulnificus* in oysters (blue), clams (magenta), and water (green) compared to salinity at time of sample collection. Data is displayed in CFU/g for shellfish samples and CFU/ml for water. Circles are individual data while lines are smoothed averages. Salinity is in parts per thousand. Vertical black line indicates 17 ppt salinity.

| Date      | Site | Weather Station | Date       | Site | Weather Station |
|-----------|------|-----------------|------------|------|-----------------|
| 2/4/2013  | HPC  | KNCATLAN1       |            |      | KMRH &          |
| 2/4/2013  | HC   | KMRH            | 8/14/2013  | NR   | KNCOTWAY2       |
| 2/14/2013 | TB   | KNBT            | 9/4/2013   | HPC  | KNCATLAN1       |
| 2/19/2013 | HPC  | KNCATLAN1       | 9/4/2013   | HC   | KMRH            |
| 2/27/2013 | TB   | KNBT            | 9/25/2013  | SR   | KNBT            |
| 2/28/2013 | NR   | KNCOTWAY2       | 9/25/2013  | NR   | KNCOTWAY2       |
| 3/4/2013  | HPC  | KNCATLAN1       | 10/2/2013  | HPC  | KNCATLAN1       |
| 3/4/2013  | HC   | KMRH            | 10/2/2013  | HC   | KMRH            |
| 3/11/2013 | SR   | KNBT            | 10/23/2013 | SR   | KNBT            |
| 3/11/2013 | NR   | KNCOTWAY2       | 10/23/2013 | NR   | KNCOTWAY2       |
| 3/19/2013 | HPC  | KNCATLAN1       | 11/7/2013  | SR   | KNBT            |
| 3/19/2013 | HC   | KMRH            | 11/7/2013  | NR   | KNCOTWAY2       |
| 3/26/2013 | SR   | KNBT            | 11/20/2013 | HC   | KMRH            |
| 3/26/2013 | NR   | KMRH            | 11/20/2013 | HPC  | KNCATLAN5       |
| 4/3/2013  | HPC  | KNCATLAN1       | 12/18/2013 | SR   | KNBT            |
| 4/3/2013  | HC   | KMRH            | 12/18/2013 | NR   | KMRH            |
| 4/9/2013  | SR   | KNBT            | 1/15/2014  | NR   | KNCOTWAY2       |
| 4/9/2013  | NR   | KNCOTWAY2       | 1/15/2014  | SR   | KNBT            |
| 4/17/2013 | HPC  | KNCATLAN1       | 1/21/2014  | HPC  | KNCATLAN1       |
| 4/17/2013 | HC   | KMRH            | 2/21/2014  | HPC  | KNCATLAN1       |
| 4/30/2013 | HPC  | KNCATLAN1       | 2/21/2014  | HC   | KMRH            |
| 4/30/2013 | HC   | KMRH            | 2/27/2014  | SR   | KNBT            |
| 5/7/2013  | SR   | KNBT            | 2/27/2014  | NR   | KNCOTWAY2       |
| 5/7/2013  | NR   | KNCOTWAY2       | 3/12/2014  | HPC  | KNCMOREH10      |
| 5/22/2013 | SR   | KNBT            | 3/12/2014  | HC   | KMRH            |
| 5/22/2013 | NR   | KNCOTWAY2       | 3/20/2014  | SR   | KNBT            |
| 5/28/2013 | HPC  | KNCATLAN1       | 4/25/2014  | HPC  | KMRH            |
| 5/28/2013 | HC   | KMRH            | 4/25/2014  | HC   | KMRH            |
| 6/5/2013  | NR   | KNCOTWAY2       | 5/1/2014   | SR   | KNBT            |
| 6/12/2013 | HPC  | KNCATLAN1       | 5/8/2014   | HPC  | KNCATLAN1       |
| 6/12/2013 | HC   | KMRH            | 5/8/2014   | HC   | KMRH            |
| 6/19/2013 | NR   | KNCOTWAY2       | 5/23/2014  | SR   | KNBT            |
| 6/19/2013 | SR   | KNBT            | 5/30/2014  | HC   | KMRH            |
| 6/25/2013 | HPC  | KNCATLAN1       | 5/30/2014  | HPC  | KNCATLAN1       |
| 6/25/2013 | HC   | KMRH            | 6/4/2014   | HPC  | KNCATLAN1       |
| 7/3/2013  | NR   | KNCOTWAY2       | 6/11/2014  | HPC  | KNCATLAN1       |
| 7/3/2013  | SR   | KNBT            | 6/13/2014  | SR   | KNBT            |
| 7/29/2013 | SR   | KNBT            | 6/20/2014  | HPC  | KNCATLAN1       |
| 8/7/2013  | HPC  | KNCATLAN1       | 6/20/2014  | HC   | KMRH            |
| 8/7/2013  | HC   | KMRH            | 6/27/2014  | HPC  | KNCATLAN1       |
| 8/14/2013 | SR   | KNBT            | 7/18/2014  | HPC  | KNCATLAN1       |
|           |      |                 | 7/18/2014  | HC   | KMRH            |

| Date       | Site | Weather Station | Date       | Site | Weather Station |
|------------|------|-----------------|------------|------|-----------------|
| 8/12/2014  | CC   | KNCMOREH6       | 6/20/2014  | HC   | KMRH            |
| 8/12/2014  | HPC  | KNCATLAN1       | 6/20/2014  | BS   | KNJM            |
| 8/15/2014  | SR   | KNBT            | 6/27/2014  | JNR  | KNCNEWPO15      |
| 8/29/2014  | HC   | KMRH            | 7/18/2014  | HC   | KMRH            |
| 9/26/2014  | HPC  | KNCATLAN1       | 7/18/2014  | JNR  | KNCNEWPO15      |
| 10/16/2014 | HC   | KMRH            | 8/29/2014  | HC   | KMRH            |
| 10/16/2014 | HPC  | KNCATLAN1       | 10/16/2014 | HC   | KMRH            |
| 10/28/2014 | SR   | KNBT            | 10/16/2014 | JNR  | KNCNEWPO15      |
| 11/6/2014  | HC   | KMRH            | 11/6/2014  | JNR  | KNCNEWPO15      |
| 11/6/2014  | HPC  | KNCATLAN1       | 11/6/2014  | HC   | KMRH            |
| 11/10/2014 | HPC  | KNCATLAN1       | 11/10/2014 | JNR  | KNCNEWPO15      |
| 2/28/2015  | HC   | KMRH            | 2/28/2015  | HC   | KMRH            |
| 3/13/2015  | SR   | KNCORIEN5       | 3/27/2015  | HC   | KMRH            |
| 3/27/2015  | HPC  | KMRH            | 3/27/2015  | BS   | KNJM            |
| 3/27/2015  | HC   | KMRH            | 4/17/2015  | BS   | KNJM            |
| 4/10/2015  | SR   | KNKT            | 4/17/2015  | HC   | KMRH            |
| 4/17/2015  | HC   | KMRH            | 5/12/2015  | HC   | KMRH            |
| 4/30/2015  | SR   | KNBT            | 6/10/2015  | HC   | KMRH            |
| 5/12/2015  | HC   | KMRH            | 7/17/2015  | BS   | KNJM            |
| 6/5/2015   | SR   | KNBT            | 7/24/2015  | HC   | KMRH            |
| 6/10/2015  | HC   | KMRH            | 9/22/2015  | HC   | KMRH            |
| 6/26/2015  | SR   | KNBT            | 10/16/2015 | HC   | KMRH            |
| 7/7/2015   | HC   | KMRH            |            |      |                 |
| 7/24/2015  | HC   | KMRH            |            |      |                 |
| 7/30/2015  | SR   | KNBT            |            |      |                 |
| 8/12/2015  | SR   | KNBT            |            |      |                 |
| 9/11/2015  | SR   | KNBT            |            |      |                 |
| 9/22/2015  | HC   | KMRH            |            |      |                 |
| 10/16/2015 | HC   | KMRH            |            |      |                 |
| 9/25/2013  | NR   | KNCATLAN1       |            |      |                 |
| 10/2/2013  | HPC  | KNCATLAN1       |            |      |                 |
| 10/2/2013  | HC   | KMRH            |            |      |                 |
| 10/23/2013 | NR   | KNCOTWAY2       |            |      |                 |
| 3/12/2014  | HC   | KMRH            |            |      |                 |
| 3/20/2014  | JNR  | KNJM            |            |      |                 |
| 4/25/2014  | JNR  | KNJM            |            |      |                 |
| 4/25/2014  | HC   | KMRH            |            |      |                 |
| 5/8/2014   | BS   | KNJM            |            |      |                 |
| 5/8/2014   | HC   | KMRH            |            |      |                 |
| 5/30/2014  | HC   | KMRH            |            |      |                 |
| 5/30/2014  | JNR  | KNCNEWPO15      |            |      |                 |
| 6/4/2014   | JNR  | KNCNEWPO15      |            |      |                 |

Table S1: Weather stations used for meteorological data for each site and sampling date. HPC = Hoop Pole Creek, HC = Harlowe Creek, TB = Turnagain Bay, SR = South River, CC = Calico Creek, NR = North River, JNR = Jumping Run Creek, SC = Spooners Creek, BS = Bogue Sound



Spearman Correlations

|                  |                | Salinity   | Water Temp  | Time Collected | Oys VIB     | Wat VIB    | 3 precip   | 3 wind      | 3 gust      | Clam VIB   | Tss        | DO       | pH       | Water Depth | Cool 30     | Hot30       | Wind Spd | Gust     |
|------------------|----------------|------------|-------------|----------------|-------------|------------|------------|-------------|-------------|------------|------------|----------|----------|-------------|-------------|-------------|----------|----------|
| "Salinity"       | Spearman Corr. | 1          | 0.16377     | -0.01897       | 0.14583     | -0.01527   | -0.02264   | -0.1882*    | -0.2457*    | 0.64082*   | 0.13695    | -0.06293 | 0.29816* | -0.44675*   | 0.15518     | -0.15269    | -0.11839 | 0.06478  |
| "Salinity"       | p-value        | --         | 0.07513     | 0.83916        | 0.13581     | 0.86911    | 0.80613    | 0.0404      | 0.00732     | 1.02878E-4 | 0.38117    | 0.70739  | 0.02068  | 3.14169E-7  | 0.09336     | 0.0988      | 0.1978   | 0.48209  |
| "Water Temp"     | Spearman Corr. | 0.16377    | 1           | -0.00904       | 0.58004     | 0.71113    | 0.17564    | -0.07203    | -0.17236    | 0.34407    | 0.36519    | -0.08622 | 0.12323  | -0.0248     | 0.93928     | -0.93779    | -0.23684 | -0.17537 |
| "Water Temp"     | p-value        | 0.07513    | --          | 0.92164        | 3.85143E-11 | 0          | 0.05199    | 0.43046     | 0.0587      | 0.04631    | 0.01258    | 0.58719  | 0.33198  | 0.78451     | 0           | 0           | 0.00809  | 0.0514   |
| "Time Collected" | Spearman Corr. | -0.01897   | -0.00904    | 1              | 0.10837     | 0.01766    | 0.19465    | -0.15784    | -0.02432    | 0.25       | -0.0318    | 0.33764  | 0.04034  | -0.01921    | 0.05386     | -0.02401    | 0.08103  | 0.14123  |
| "Time Collected" | p-value        | 0.83916    | 0.92164     | --             | 0.26426     | 0.84693    | 0.0324     | 0.08512     | 0.79294     | 0.15388    | 0.83381    | 0.02681  | 0.75163  | 0.83361     | 0.55908     | 0.79461     | 0.37492  | 0.12073  |
| "Oys VIB"        | Spearman Corr. | 0.14583    | 0.58004     | 0.10837        | 1           | 0.49511    | 0.32223    | -0.17263    | -0.19255    | 0.65564    | 0.46422    | 0.08054  | 0.09295  | 0.06424     | 0.67729     | -0.653      | -0.12735 | -0.10991 |
| "Oys VIB"        | p-value        | 0.13581    | 3.85143E-11 | 0.26426        | --          | 3.82917E-8 | 6.33025E-4 | 0.07401     | 0.04692     | 0.0017     | 0.0038     | 0.64556  | 0.51219  | 0.50496     | 8.88178E-16 | 1.88738E-14 | 0.1849   | 0.25301  |
| "Wat VIB"        | Spearman Corr. | -0.01527   | 0.71113     | 0.01766        | 0.49511     | 1          | 0.2223     | 0.03965     | -0.14212    | 0.00795    | 0.51223    | -0.22405 | -0.06832 | -0.14644    | 0.70636     | -0.73315    | -0.22987 | -0.20546 |
| "Wat VIB"        | p-value        | 0.86911    | 0           | 0.84693        | 3.82917E-8  | --         | 0.01347    | 0.6646      | 0.11994     | 0.96442    | 2.73623E-4 | 0.14864  | 0.59168  | 0.10461     | 0           | 0           | 0.01022  | 0.02206  |
| "3 precip"       | Spearman Corr. | -0.02264   | 0.17564     | 0.19465        | 0.32223     | 0.2223     | 1          | -0.07428    | 0.16054     | -0.07192   | 0.15825    | 0.04689  | -0.05804 | -0.02463    | 0.24643     | -0.23113    | -0.09905 | 0.01312  |
| "3 precip"       | p-value        | 0.80613    | 0.05199     | 0.0324         | 6.33025E-4  | 0.01347    | --         | 0.41423     | 0.07731     | 0.68608    | 0.29353    | 0.76808  | 0.64873  | 0.78597     | 0.00621     | 0.01042     | 0.27373  | 0.88502  |
| "3 wind"         | Spearman Corr. | -0.1882    | -0.07203    | -0.15784       | -0.17263    | 0.03965    | -0.07428   | 1           | 0.64177     | -0.2158    | 0.08974    | -0.14407 | -0.10203 | -0.09685    | -0.10919    | 0.05341     | 0.26169  | 0.14429  |
| "3 wind"         | p-value        | 0.0404     | 0.43046     | 0.08512        | 0.07401     | 0.6646     | 0.41423    | --          | 2.22045E-15 | 0.22028    | 0.55313    | 0.36882  | 0.42239  | 0.28655     | 0.23317     | 0.5607      | 0.00346  | 0.11133  |
| "3 gust"         | Spearman Corr. | -0.2457    | -0.17236    | -0.02432       | -0.19255    | -0.14212   | 0.16054    | 0.64177     | 1           | -0.34538   | -0.01881   | 0.01442  | -0.28509 | 0.07989     | -0.17879    | 0.16053     | 0.1915   | 0.1427   |
| "3 gust"         | p-value        | 0.00732    | 0.0587      | 0.79294        | 0.04692     | 0.11994    | 0.07731    | 2.22045E-15 | --          | 0.05285    | 0.90238    | 0.92962  | 0.02471  | 0.38172     | 0.05072     | 0.07986     | 0.0346   | 0.11689  |
| "Clam VIB"       | Spearman Corr. | 0.64082    | 0.34407     | 0.25           | 0.65564     | 0.00795    | -0.07192   | -0.2158     | -0.34538    | 1          | 0.21587    | 0.33235  | 0.3206   | 0.10624     | 0.44424     | -0.41334    | -0.09299 | 0.04766  |
| "Clam VIB"       | p-value        | 1.02878E-4 | 0.04631     | 0.15388        | 0.0017      | 0.96442    | 0.68608    | 0.22028     | 0.05285     | --         | 0.36067    | 0.2085   | 0.09625  | 0.54985     | 0.0096      | 0.01681     | 0.60094  | 0.78896  |
| "Tss"            | Spearman Corr. | 0.13695    | 0.36519     | -0.0318        | 0.46422     | 0.51223    | 0.15825    | 0.08974     | -0.01881    | 0.21587    | 1          | 0.02541  | -0.17878 | -0.41924    | 0.49313     | -0.42136    | -0.23774 | -0.19123 |
| "Tss"            | p-value        | 0.38117    | 0.01258     | 0.83381        | 0.0038      | 2.73623E-4 | 0.29353    | 0.55313     | 0.90238     | 0.36067    | --         | 0.89206  | 0.23999  | 0.00335     | 5.78024E-4  | 0.00394     | 0.10758  | 0.19786  |
| "DO"             | Spearman Corr. | -0.06293   | -0.08622    | 0.33764        | 0.08054     | -0.22405   | 0.04689    | -0.14407    | 0.01442     | 0.33235    | 0.02541    | 1        | -0.02407 | -0.07584    | -0.02218    | 0.12233     | 0.33598  | 0.38619  |
| "DO"             | p-value        | 0.70739    | 0.58719     | 0.02681        | 0.64556     | 0.14864    | 0.76808    | 0.36882     | 0.92962     | 0.2085     | 0.89206    | --       | 0.88279  | 0.62882     | 0.88773     | 0.43454     | 0.02761  | 0.01053  |
| "pH"             | Spearman Corr. | 0.29816    | 0.12323     | 0.04034        | 0.09295     | -0.06832   | -0.05804   | -0.10203    | -0.28509    | 0.3206     | -0.17878   | -0.02407 | 1        | 0.03482     | 0.04038     | -0.04804    | -0.09866 | -0.0148  |
| "pH"             | p-value        | 0.02068    | 0.33198     | 0.75163        | 0.51219     | 0.59168    | 0.64873    | 0.42239     | 0.02471     | 0.09625    | 0.23999    | 0.88279  | --       | 0.78305     | 0.75335     | 0.70851     | 0.43427  | 0.90684  |
| "Water Depth"    | Spearman Corr. | -0.44675   | -0.0248     | -0.01921       | 0.06424     | -0.14644   | -0.02463   | -0.09685    | 0.07989     | 0.10624    | -0.41924   | -0.07584 | 0.03482  | 1           | 0.03137     | -0.00551    | -0.00132 | -0.10754 |
| "Water Depth"    | p-value        | 3.14169E-7 | 0.78451     | 0.83361        | 0.50496     | 0.10461    | 0.78597    | 0.28655     | 0.38172     | 0.54985    | 0.00335    | 0.62882  | 0.78305  | --          | 0.7305      | 0.95174     | 0.98836  | 0.23259  |
| "Cool 30"        | Spearman Corr. | 0.15518    | 0.93928     | 0.05386        | 0.67729     | 0.70636    | 0.24643    | -0.10919    | -0.17879    | 0.44424    | 0.49313    | -0.02218 | 0.04038  | 0.03137     | 1           | -0.97411    | -0.24877 | -0.18993 |
| "Cool 30"        | p-value        | 0.09336    | 0           | 0.55908        | 8.88178E-16 | 0          | 0.00621    | 0.23317     | 0.05072     | 0.0096     | 5.78024E-4 | 0.88773  | 0.75335  | 0.7305      | --          | 0           | 0.00553  | 0.03537  |

Table S2: Spearman's rank correlation matrix for total *Vibrio* spp. with significance and correlation coefficients.

|                  |                | Salinity   | Water Temp | Time Collected | Oys VV     | Wat VV     | 3 precip | 3 wind      | 3 gust      | Clam W   | Tss        | DO       | pH       | Water Depth | Cool 30    | Hot30      | Wind Spd | Gust     |
|------------------|----------------|------------|------------|----------------|------------|------------|----------|-------------|-------------|----------|------------|----------|----------|-------------|------------|------------|----------|----------|
| "Salinity"       | Spearman Corr. | 1          | 0.16377    | -0.01897       | -0.44789   | -0.38578   | -0.02264 | -0.1882     | -0.2457     | -0.21099 | 0.13695    | -0.06293 | 0.29816  | -0.44675    | 0.15518    | -0.15269   | -0.11839 | 0.06478  |
|                  | p-value        | --         | 0.07513    | 0.83916        | 2.97468E-6 | 3.15243E-5 | 0.80613  | 0.0404      | 0.00732     | 0.27191  | 0.38117    | 0.70739  | 0.02068  | 3.14169E-7  | 0.09336    | 0.0988     | 0.1978   | 0.48209  |
| "Water Temp"     | Spearman Corr. | 0.16377    | 1          | -0.00904       | 0.42928    | 0.48428    | 0.17564  | -0.07203    | -0.17236    | 0.05446  | 0.36519    | -0.08622 | 0.12323  | -0.0248     | 0.93928    | -0.93779   | -0.23684 | -0.17537 |
|                  | p-value        | 0.07513    | --         | 0.92164        | 6.04907E-6 | 5.48804E-8 | 0.05199  | 0.43046     | 0.0587      | 0.76719  | 0.01258    | 0.58719  | 0.33198  | 0.78451     | 0          | 0          | 0.00809  | 0.0514   |
| "Time Collected" | Spearman Corr. | -0.01897   | -0.00904   | 1              | 0.00593    | 0.12693    | 0.19465  | -0.15784    | -0.02432    | 0.12677  | -0.0318    | 0.33764  | 0.04034  | -0.01921    | 0.05386    | -0.02401   | 0.08103  | 0.14123  |
|                  | p-value        | 0.83916    | 0.92164    | --             | 0.95332    | 0.18637    | 0.0324   | 0.08512     | 0.79294     | 0.48932  | 0.83381    | 0.02681  | 0.75163  | 0.83361     | 0.55908    | 0.79461    | 0.37492  | 0.12073  |
| "Oys VV"         | Spearman Corr. | -0.44789   | 0.42928    | 0.00593        | 1          | 0.77604    | 0.18187  | 0.01679     | -0.05629    | 0.36171  | 0.29888    | 0.11208  | -0.16686 | 0.29946     | 0.45351    | -0.45758   | -0.06057 | -0.1901  |
|                  | p-value        | 2.97468E-6 | 6.04907E-6 | 0.95332        | --         | 0          | 0.06732  | 0.86763     | 0.57606     | 0.15369  | 0.09111    | 0.55543  | 0.26771  | 0.00212     | 1.91013E-6 | 1.50292E-6 | 0.54335  | 0.05444  |
| "Wat VV"         | Spearman Corr. | -0.38578   | 0.48428    | 0.12693        | 0.77604    | 1          | 0.19567  | 0.01736     | -0.09735    | 0.39163  | 0.4894     | 0.03028  | -0.12701 | 0.13001     | 0.53163    | -0.51184   | -0.14031 | -0.17878 |
|                  | p-value        | 3.15243E-5 | 5.48804E-8 | 0.18637        | 0          | --         | 0.03868  | 0.85648     | 0.31164     | 0.03234  | 0.00116    | 0.85878  | 0.35093  | 0.16993     | 1.92852E-9 | 9.386E-9   | 0.13828  | 0.05814  |
| "3 precip"       | Spearman Corr. | -0.02264   | 0.17564    | 0.19465        | 0.18187    | 0.19567    | 1        | -0.07428    | 0.16054     | 0.06179  | 0.15825    | 0.04689  | -0.05804 | -0.02463    | 0.24643    | -0.23113   | -0.09905 | 0.01312  |
|                  | p-value        | 0.80613    | 0.05199    | 0.0324         | 0.06732    | 0.03868    | --       | 0.41423     | 0.07731     | 0.73691  | 0.29353    | 0.76808  | 0.64873  | 0.78597     | 0.06261    | 0.01042    | 0.27373  | 0.88502  |
| "3 wind"         | Spearman Corr. | -0.1882    | -0.07203   | -0.15784       | 0.01679    | 0.01736    | -0.07428 | 1           | 0.64177     | -0.05119 | 0.08974    | -0.14407 | -0.10203 | -0.09685    | -0.10919   | 0.05341    | 0.26169  | 0.14429  |
|                  | p-value        | 0.0404     | 0.43046    | 0.08512        | 0.86763    | 0.85648    | 0.41423  | --          | 2.22045E-15 | 0.78082  | 0.55313    | 0.36882  | 0.42239  | 0.28655     | 0.23317    | 0.5607     | 0.00346  | 0.11133  |
| "3 gust"         | Spearman Corr. | -0.2457    | -0.17236   | -0.02432       | -0.05629   | -0.09735   | 0.16054  | 0.64177     | 1           | -0.09881 | -0.01881   | 0.01442  | -0.28509 | 0.07989     | -0.17879   | 0.16053    | 0.1915   | 0.1429   |
|                  | p-value        | 0.00732    | 0.0587     | 0.79294        | 0.57606    | 0.31164    | 0.07731  | 2.22045E-15 | --          | 0.60342  | 0.90238    | 0.92962  | 0.02471  | 0.38172     | 0.05072    | 0.07986    | 0.0346   | 0.11689  |
| "Clam W"         | Spearman Corr. | -0.21099   | 0.05446    | 0.12677        | 0.36171    | 0.39163    | 0.06179  | -0.05119    | -0.09881    | 1        | 0.4247     | 0.50848  | -0.33258 | -0.0236     | 0.16501    | -0.16378   | 0.01067  | 0.04802  |
|                  | p-value        | 0.27191    | 0.76719    | 0.48932        | 0.15369    | 0.03234    | 0.73691  | 0.78082     | 0.60342     | --       | 0.06991    | 0.06336  | 0.0969   | 0.89798     | 0.37504    | 0.37864    | 0.95377  | 0.79409  |
| "Tss"            | Spearman Corr. | 0.13695    | 0.36519    | -0.0318        | 0.29888    | 0.4894     | 0.15825  | 0.08974     | -0.01881    | 0.4247   | 1          | 0.02541  | -0.17878 | -0.41924    | 0.49313    | -0.42136   | -0.23774 | -0.19123 |
|                  | p-value        | 0.38117    | 0.01258    | 0.83381        | 0.09111    | 0.00116    | 0.29353  | 0.55313     | 0.90238     | 0.06991  | --         | 0.89206  | 0.23999  | 0.00335     | 5.78024E-4 | 0.00394    | 0.10758  | 0.19787  |
| "DO"             | Spearman Corr. | -0.06293   | -0.08622   | 0.33764        | 0.11208    | 0.03028    | 0.04689  | -0.14407    | 0.01442     | 0.50848  | 0.02541    | 1        | -0.02407 | -0.07584    | -0.02218   | 0.12233    | 0.33598  | 0.38619  |
|                  | p-value        | 0.70739    | 0.58719    | 0.02681        | 0.55543    | 0.85878    | 0.76808  | 0.36882     | 0.92962     | 0.06336  | 0.89206    | --       | 0.88279  | 0.62882     | 0.88773    | 0.43454    | 0.02761  | 0.01053  |
| "pH"             | Spearman Corr. | 0.29816    | 0.12323    | 0.04034        | -0.16686   | -0.12701   | -0.05804 | -0.10203    | -0.28509    | -0.33258 | -0.17878   | -0.02407 | 1        | 0.03482     | 0.04038    | -0.04804   | -0.09866 | -0.01442 |
|                  | p-value        | 0.02068    | 0.33198    | 0.75163        | 0.26771    | 0.35093    | 0.64873  | 0.42239     | 0.02471     | 0.0969   | 0.23999    | 0.88279  | --       | 0.78305     | 0.75335    | 0.70851    | 0.43427  | 0.90684  |
| "Water Depth"    | Spearman Corr. | -0.44675   | -0.0248    | -0.01921       | 0.29946    | 0.13001    | -0.02463 | -0.09685    | 0.07989     | -0.0236  | -0.41924   | -0.07584 | 0.03482  | 1           | 0.03137    | -0.00551   | -0.00132 | -0.10758 |
|                  | p-value        | 3.14169E-7 | 0.78451    | 0.83361        | 0.00212    | 0.16993    | 0.78597  | 0.28655     | 0.38172     | 0.89798  | 0.00335    | 0.62882  | 0.78305  | --          | 0.7305     | 0.95174    | 0.98836  | 0.23259  |
| "Cool 30"        | Spearman Corr. | 0.15518    | 0.93928    | 0.05386        | 0.45351    | 0.53163    | 0.24643  | -0.10919    | -0.17879    | 0.16501  | 0.49313    | -0.02218 | 0.04038  | 0.03137     | 1          | -0.97411   | -0.24877 | -0.18992 |
|                  | p-value        | 0.09336    | 0          | 0.55908        | 1.91013E-6 | 1.92852E-9 | 0.00621  | 0.23317     | 0.05072     | 0.37504  | 5.78024E-4 | 0.88773  | 0.75335  | 0.7305      | --         | 0          | 0.00553  | 0.03537  |
| "Hot30"          | Spearman Corr. | -0.15269   | -0.93779   | -0.02401       | -0.45758   | -0.51184   | -0.23113 | 0.05341     | 0.16053     | -0.16378 | -0.42136   | 0.12233  | -0.04804 | -0.00551    | -0.97411   | 1          | 0.24369  | 0.17977  |
|                  | p-value        | 0.0988     | 0          | 0.79461        | 1.50292E-6 | 9.386E-9   | 0.01042  | 0.5607      | 0.07986     | 0.37864  | 0.00394    | 0.43454  | 0.70851  | 0.95174     | 0          | --         | 0.0066   | 0.04663  |
| "Wind Spd"       | Spearman Corr. | -0.11839   | -0.23684   | 0.08103        | -0.06057   | -0.14031   | -0.09905 | 0.26169     | 0.1915      | 0.01067  | -0.23774   | 0.33598  | -0.09866 | -0.00132    | -0.24877   | 0.24369    | 1        | 0.90992  |
|                  | p-value        | 0.1978     | 0.00809    | 0.37492        | 0.54335    | 0.13828    | 0.27373  | 0.00346     | 0.0346      | 0.95377  | 0.10758    | 0.02761  | 0.43427  | 0.98836     | 0.00553    | 0.0066     | --       | 0        |
| "Gust"           | Spearman Corr. | 0.06478    | -0.17537   | 0.14123        | -0.1901    | -0.17878   | 0.01312  | 0.14429     | 0.1427      | 0.04802  | -0.19123   | 0.38619  | -0.0148  | -0.10754    | -0.18993   | 0.17977    | 0.90992  | 1        |
|                  | p-value        | 0.48209    | 0.0514     | 0.12073        | 0.05444    | 0.05814    | 0.88502  | 0.11133     | 0.11689     | 0.79409  | 0.19786    | 0.01053  | 0.90684  | 0.23259     | 0.03537    | 0.04663    | 0        | --       |

2-tailed test of significance is used

Table S3: Spearman's rank correlation matrix for total *V. vulnificus* with significance and correlation coefficients.

|                  |                | Salinity   | Water Temp  | Time Collected | Oys VP      | Wat VP      | 3 precip | 3 wind      | 3 gust      | Clam VP  | Tss        | DO       | pH       | Water Depth | Wind Spd | Gust     | Cool 30     | Hot30       |
|------------------|----------------|------------|-------------|----------------|-------------|-------------|----------|-------------|-------------|----------|------------|----------|----------|-------------|----------|----------|-------------|-------------|
| "Salinity"       | Spearman Corr. | 1          | 0.16377     | -0.01897       | 0.1606      | 2.98567E-4  | -0.02264 | -0.1882     | -0.2457     | 0.24886  | 0.13695    | -0.06293 | 0.29816  | -0.44675    | -0.11839 | 0.06478  | 0.15518     | -0.15269    |
|                  | p-value        | --         | 0.07513     | 0.83916        | 0.10686     | 0.99753     | 0.80613  | 0.0404      | 0.00732     | 0.17701  | 0.38117    | 0.70739  | 0.02068  | 3.14169E-7  | 0.1978   | 0.48209  | 0.09336     | 0.0988      |
| "Water Temp"     | Spearman Corr. | 0.16377    | 1           | -0.00904       | 0.58775     | 0.69426     | 0.17564  | -0.07203    | -0.17236    | 0.36375  | 0.36519    | -0.08622 | 0.12323  | -0.0248     | -0.23684 | -0.17537 | 0.93928     | -0.93779    |
|                  | p-value        | 0.07513    | --          | 0.92164        | 4.35216E-11 | 0           | 0.05199  | 0.43046     | 0.0587      | 0.03445  | 0.01258    | 0.58719  | 0.33198  | 0.78451     | 0.00809  | 0.0514   | 0           | 0           |
| "Time Collected" | Spearman Corr. | -0.01897   | -0.00904    | 1              | 0.01696     | 0.07185     | 0.19465  | -0.15784    | -0.02432    | 0.33494  | -0.0318    | 0.33764  | 0.04034  | -0.01921    | 0.08103  | 0.14123  | 0.05386     | -0.02401    |
|                  | p-value        | 0.83916    | 0.92164     | --             | 0.86431     | 0.45155     | 0.0324   | 0.08512     | 0.79294     | 0.05283  | 0.83381    | 0.02681  | 0.75163  | 0.83361     | 0.37492  | 0.12073  | 0.55908     | 0.79461     |
| "Oys VP"         | Spearman Corr. | 0.1606     | 0.58775     | 0.01696        | 1           | 0.64366     | 0.27671  | -0.04148    | -0.08603    | 0.15694  | 0.3951     | -0.09768 | -0.05375 | -0.13242    | -0.11252 | -0.05801 | 0.61142     | -0.61403    |
|                  | p-value        | 0.10686    | 4.35216E-11 | 0.86431        | --          | 6.68576E-13 | 0.00427  | 0.67586     | 0.38755     | 0.52111  | 0.02074    | 0.59483  | 0.7167   | 0.17602     | 0.25079  | 0.55476  | 5.42633E-12 | 4.16356E-12 |
| "Wat VP"         | Spearman Corr. | 2.98567E-4 | 0.69426     | 0.07185        | 0.64366     | 1           | 0.20132  | -0.07295    | -0.17575    | 0.42549  | 0.43383    | 0.03358  | -0.17951 | -0.16109    | -0.1627  | -0.11078 | 0.67349     | -0.68867    |
|                  | p-value        | 0.99753    | 0           | 0.45155        | 6.68576E-13 | --          | 0.03172  | 0.44256     | 0.0638      | 0.01519  | 0.00326    | 0.83702  | 0.16994  | 0.08546     | 0.08233  | 0.23856  | 2.22045E-16 | 0           |
| "3 precip"       | Spearman Corr. | -0.02264   | 0.17564     | 0.19465        | 0.27671     | 0.20132     | 1        | -0.07428    | 0.16054     | -0.15382 | 0.15825    | 0.04689  | -0.05804 | -0.02463    | -0.09905 | 0.01312  | 0.24643     | -0.23113    |
|                  | p-value        | 0.80613    | 0.05199     | 0.0324         | 0.00427     | 0.03172     | --       | 0.41423     | 0.07731     | 0.38508  | 0.29353    | 0.76808  | 0.64873  | 0.78597     | 0.27373  | 0.88502  | 0.00621     | 0.01042     |
| "3 wind"         | Spearman Corr. | -0.1882    | -0.07203    | -0.15784       | -0.04148    | -0.07295    | -0.07428 | 1           | 0.64177     | -0.18487 | 0.08974    | -0.14407 | -0.10203 | -0.09685    | 0.26169  | 0.14429  | -0.10919    | 0.05341     |
|                  | p-value        | 0.0404     | 0.43046     | 0.08512        | 0.67586     | 0.44256     | 0.41423  | --          | 2.22045E-15 | 0.05283  | 0.55313    | 0.36882  | 0.42239  | 0.28655     | 0.00346  | 0.11133  | 0.23317     | 0.5607      |
| "3 gust"         | Spearman Corr. | -0.2457    | -0.17236    | -0.02432       | -0.08603    | -0.17575    | 0.16054  | 0.64177     | 1           | -0.17948 | -0.01881   | 0.01442  | -0.28509 | 0.07989     | 0.1915   | 0.1427   | -0.17879    | 0.16053     |
|                  | p-value        | 0.00732    | 0.0587      | 0.79294        | 0.38755     | 0.0638      | 0.07731  | 2.22045E-15 | --          | 0.32565  | 0.90238    | 0.92962  | 0.02471  | 0.38172     | 0.0346   | 0.11689  | 0.05072     | 0.07986     |
| "Clam VP"        | Spearman Corr. | 0.24886    | 0.36375     | 0.33494        | 0.15694     | 0.42549     | -0.15382 | -0.18487    | -0.17948    | 1        | 0.1275     | 0.28258  | 0.2276   | -0.13626    | 0.26953  | 0.3273   | 0.35083     | -0.37658    |
|                  | p-value        | 0.17701    | 0.03445     | 0.05283        | 0.52111     | 0.01519     | 0.38508  | 0.29523     | 0.32565     | --       | 0.59219    | 0.28894  | 0.2441   | 0.44224     | 0.12319  | 0.05882  | 0.04531     | 0.03077     |
| "Tss"            | Spearman Corr. | 0.13695    | 0.36519     | -0.0318        | 0.3951      | 0.43383     | 0.15825  | 0.08974     | -0.01881    | 0.1275   | 1          | 0.02541  | -0.17878 | -0.41924    | -0.23774 | -0.19123 | 0.49313     | -0.42136    |
|                  | p-value        | 0.38117    | 0.01258     | 0.83381        | 0.02074     | 0.00326     | 0.29353  | 0.55313     | 0.90238     | 0.59219  | --         | 0.89206  | 0.23999  | 0.00335     | 0.10758  | 0.19786  | 5.78024E-4  | 0.00394     |
| "DO"             | Spearman Corr. | -0.06293   | -0.08622    | 0.33764        | -0.09768    | 0.03358     | 0.04689  | -0.14407    | 0.01442     | 0.28258  | 0.02541    | 1        | -0.02407 | -0.07584    | 0.33598  | 0.38619  | -0.02218    | 0.12233     |
|                  | p-value        | 0.70739    | 0.58719     | 0.02681        | 0.59483     | 0.83702     | 0.76808  | 0.36882     | 0.92962     | 0.28894  | 0.89206    | --       | 0.88279  | 0.62882     | 0.02761  | 0.01053  | 0.88773     | 0.43454     |
| "pH"             | Spearman Corr. | 0.29816    | 0.12323     | 0.04034        | -0.05375    | -0.17951    | -0.05804 | -0.10203    | -0.28509    | 0.2276   | -0.17878   | -0.02407 | 1        | 0.03482     | -0.09866 | -0.0148  | 0.04038     | -0.04804    |
|                  | p-value        | 0.02068    | 0.33198     | 0.75163        | 0.7167      | 0.16994     | 0.64873  | 0.42239     | 0.02471     | 0.2441   | 0.23999    | 0.88279  | --       | 0.78305     | 0.43427  | 0.90684  | 0.75335     | 0.70851     |
| "Water Depth"    | Spearman Corr. | -0.44675   | -0.0248     | -0.01921       | -0.13242    | -0.16109    | -0.02463 | -0.09685    | 0.07989     | -0.13626 | -0.41924   | -0.07584 | 0.03482  | 1           | -0.00132 | -0.10754 | 0.03137     | -0.00551    |
|                  | p-value        | 3.14169E-7 | 0.78451     | 0.83361        | 0.17602     | 0.08546     | 0.78597  | 0.28655     | 0.38172     | 0.44224  | 0.00335    | 0.62882  | 0.78305  | --          | 0.98836  | 0.23259  | 0.7305      | 0.95174     |
| "Wind Spd"       | Spearman Corr. | -0.11839   | -0.23684    | 0.08103        | -0.11252    | -0.1627     | -0.09905 | 0.26169     | 0.1915      | 0.26953  | -0.23774   | 0.33598  | -0.09866 | -0.00132    | 1        | 0.90992  | -0.24877    | 0.24369     |
|                  | p-value        | 0.1978     | 0.00809     | 0.37492        | 0.25079     | 0.08233     | 0.27373  | 0.00346     | 0.0346      | 0.12319  | 0.10758    | 0.02761  | 0.43427  | 0.98836     | --       | 0        | 0.00553     | 0.0066      |
| "Gust"           | Spearman Corr. | 0.06478    | -0.17537    | 0.14123        | -0.05801    | -0.11078    | 0.01312  | 0.14429     | 0.1427      | 0.3273   | -0.19123   | 0.38619  | -0.0148  | -0.10754    | 0.90992  | 1        | -0.18993    | 0.17977     |
|                  | p-value        | 0.48209    | 0.0514      | 0.12073        | 0.55476     | 0.23856     | 0.88502  | 0.11133     | 0.11689     | 0.05882  | 0.19786    | 0.01053  | 0.90684  | 0.23259     | 0        | --       | 0.03537     | 0.04663     |
| "Cool 30"        | Spearman Corr. | 0.15518    | 0.93928     | 0.05386        | 0.61142     | 0.67349     | 0.24643  | -0.10919    | -0.17879    | 0.35083  | 0.49313    | -0.02218 | 0.04038  | 0.03137     | -0.24877 | -0.18993 | 1           | -0.97411    |
|                  | p-value        | 0.09336    | 0           | 0.55908        | 5.42633E-12 | 2.22045E-16 | 0.00621  | 0.23317     | 0.05072     | 0.04531  | 5.78024E-4 | 0.88773  | 0.75335  | 0.7305      | 0.00553  | 0.03537  | --          | 0           |
| "Hot30"          | Spearman Corr. | -0.15269   | -0.93779    | -0.02401       | -0.61403    | -0.68867    | -0.23113 | 0.05341     | 0.16053     | -0.37658 | -0.42136   | 0.12233  | -0.04804 | -0.00551    | 0.24369  | 0.17977  | -0.97411    | 1           |
|                  | p-value        | 0.0988     | 0           | 0.79461        | 4.16356E-12 | 0           | 0.01042  | 0.5607      | 0.07986     | 0.03077  | 0.00394    | 0.43454  | 0.70851  | 0.95174     | 0.0066   | 0.04663  | 0           | --          |

2-tailed test of significance is used

Table S4: Spearman's rank correlation matrix for total *V. parahaemolyticus* with significance and correlation coefficients.
